# Supplementary material for: Loss of MyoD Promotes Fate Transdifferentiation of Myoblasts Into Brown Adipocytes
Source: PubMed Central journal article supplement — eBioMedicine. 2017 Jan 13;16:212–23. doi: 10.1016/j.ebiom.2017.01.015 (PMC5474440; doi:10.1016/j.ebiom.2017.01.015), 2017-01-13

**Supplementary Figure 1. Generation of C2C12-knockout cell clones with CRISPR-Cas9**

**technique.** (a) Electrophoresis of PCR product from C2C12<sup>Cas9</sup> myoblasts transfected with or without gRNAs. (b) DNA sequence maps around the targeting locus of control and selected MyoD<sup>KO</sup> cell clones. (c) Detection off-targets of *MyoD* sgRNA. (d) Immunostaining of MF20 (Red) and DAPI (Cyan) in control and MyoD<sup>KO</sup> C2C12 myoblasts after 3 days induction of differentiation.

**Supplementary Figure 2. Overexpression of miR-133 inhibits adipogenesis of MyoD<sup>KO</sup>**

**C2C12 myoblasts.** (a and b) qPCR analysis of miR-133a (a) and adipogenic marker genes (b).

N=3 different passages of myoblasts. Error bars represent SD, \* indicates  $p < 0.01$ .

**Supplementary Figure 3. Loss of MyoD facilitates adipogenic transdifferentiation of**

**myoblasts *in vivo*.** (a) Immunostaining of BODIPY (green) and Dystrophin (red) in TA muscles

of mdx mice injected with control or MyoD<sup>KO</sup> C2C12 cells. (b) Quantification of Dystrophin<sup>+</sup>

myofibers. (c) Triglyceride concentrations in TA muscles injected with control or MyoD<sup>KO</sup>

C2C12 cells. N=3 independent biological samples. Four sections were analyzed for each sample.

Error bars represent SD, \* indicates  $p < 0.05$ .

**Supplementary Figure 4. MyoD transdifferentiates brown preadipocytes into myocytes.** (a)

Immunostaining of BODIPY in MyoD<sup>OE</sup> brown preadipocytes. (b) Immunostaining of MF20

(red) in control and MyoD<sup>OE</sup> brown adipocytes. (c) Ratio of MF20 signal in elongated GFP<sup>+</sup> cells.

N=3 different passages of myoblasts. Error bars represent SD, \* indicates  $p < 0.01$ .

**Supplementary Table 1 List of top 5 putative off-targets homologous to *MyoD*-sgRNA**

| Position<br>MyoD | 20       | 19       | 18       | 17       | 16       | 15 | 14       | 13       | 12 | 11 | 10       | 9 | 8 | 7 | 6 | 5 | 4 | 3 | 2        | 1 | N        | G        | G | Locus<br>Chro.:Start position |
|------------------|----------|----------|----------|----------|----------|----|----------|----------|----|----|----------|---|---|---|---|---|---|---|----------|---|----------|----------|---|-------------------------------|
| OT1              | C        | C        | <b>T</b> | <b>A</b> | G        | T  | C        | C        | T  | C  | A        | A | A | A | A | A | G | C | <b>T</b> | C | A        | G        | G | chr1:-106859905               |
| OT2              | C        | <b>T</b> | A        | <b>A</b> | G        | T  | C        | <b>A</b> | T  | C  | A        | A | A | A | A | A | G | C | <b>A</b> | C | <b>T</b> | G        | G | chr13:+78086880               |
| OT3              | C        | C        | A        | <b>T</b> | <b>C</b> | T  | C        | <b>A</b> | T  | C  | A        | A | A | A | A | A | G | C | <b>T</b> | C | A        | G        | G | chr19:+50585297               |
| OT4              | <b>A</b> | C        | A        | <b>C</b> | G        | T  | <b>G</b> | C        | T  | C  | A        | A | A | A | A | A | G | C | <b>A</b> | C | <b>G</b> | <b>A</b> | G | chr1:-39340833                |
| OT5              | C        | C        | A        | G        | G        | T  | <b>G</b> | C        | T  | C  | <b>C</b> | A | A | A | A | A | G | C | <b>A</b> | C | A        | G        | G | chr12:-113574844              |

PAM is in grey. Bases different from sgRNA are in red.

**Supplementary Table 2 Primer sequences (5'-3')**

| Gene          | Sequence                                     |
|---------------|----------------------------------------------|
| OT1           | GGCTGAAAGGCTTGTACTCG<br>GGAGCATTTCAGGCATCAAT |
| OT2           | GGTGGAAAGGCTGTTGATGT<br>GCCAGAGTGATCGGAATGAT |
| OT3           | TCCCTGGCTATGCAAAATTC<br>CATTCATGGAGCCTGTGTGT |
| OT4           | ACATGTATGCCAGATGCAA<br>GTGCTCCAACGAGTGAGACA  |
| OT5           | CCCAAGTTCATGTCCCTAA<br>TGAGCAAGGTTTGCAGTTTG  |
| <i>MyoD-f</i> | AAGCGGCCGCATGGAGCTTCTATCGCCGC                |
| <i>MyoD-r</i> | TTTCTAGATCAAAGCACCTGATAAATC                  |

Supplementary Figure 1

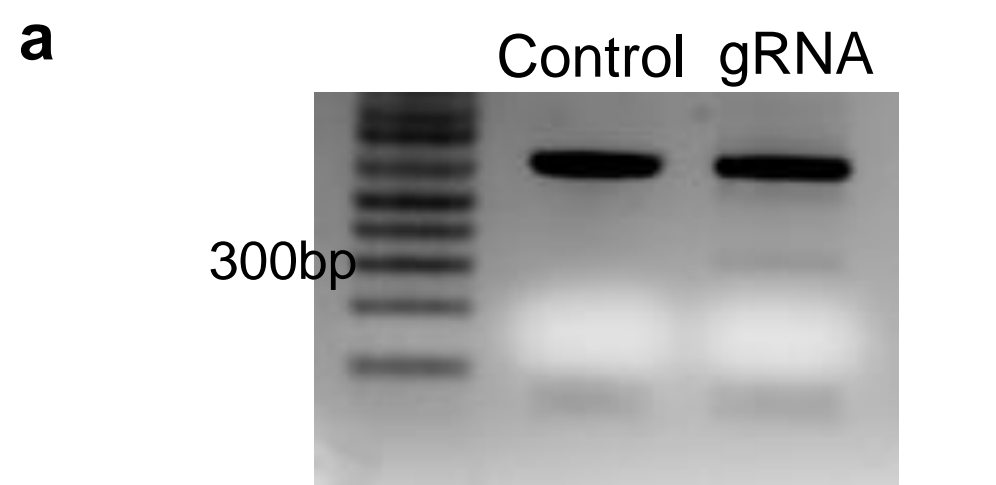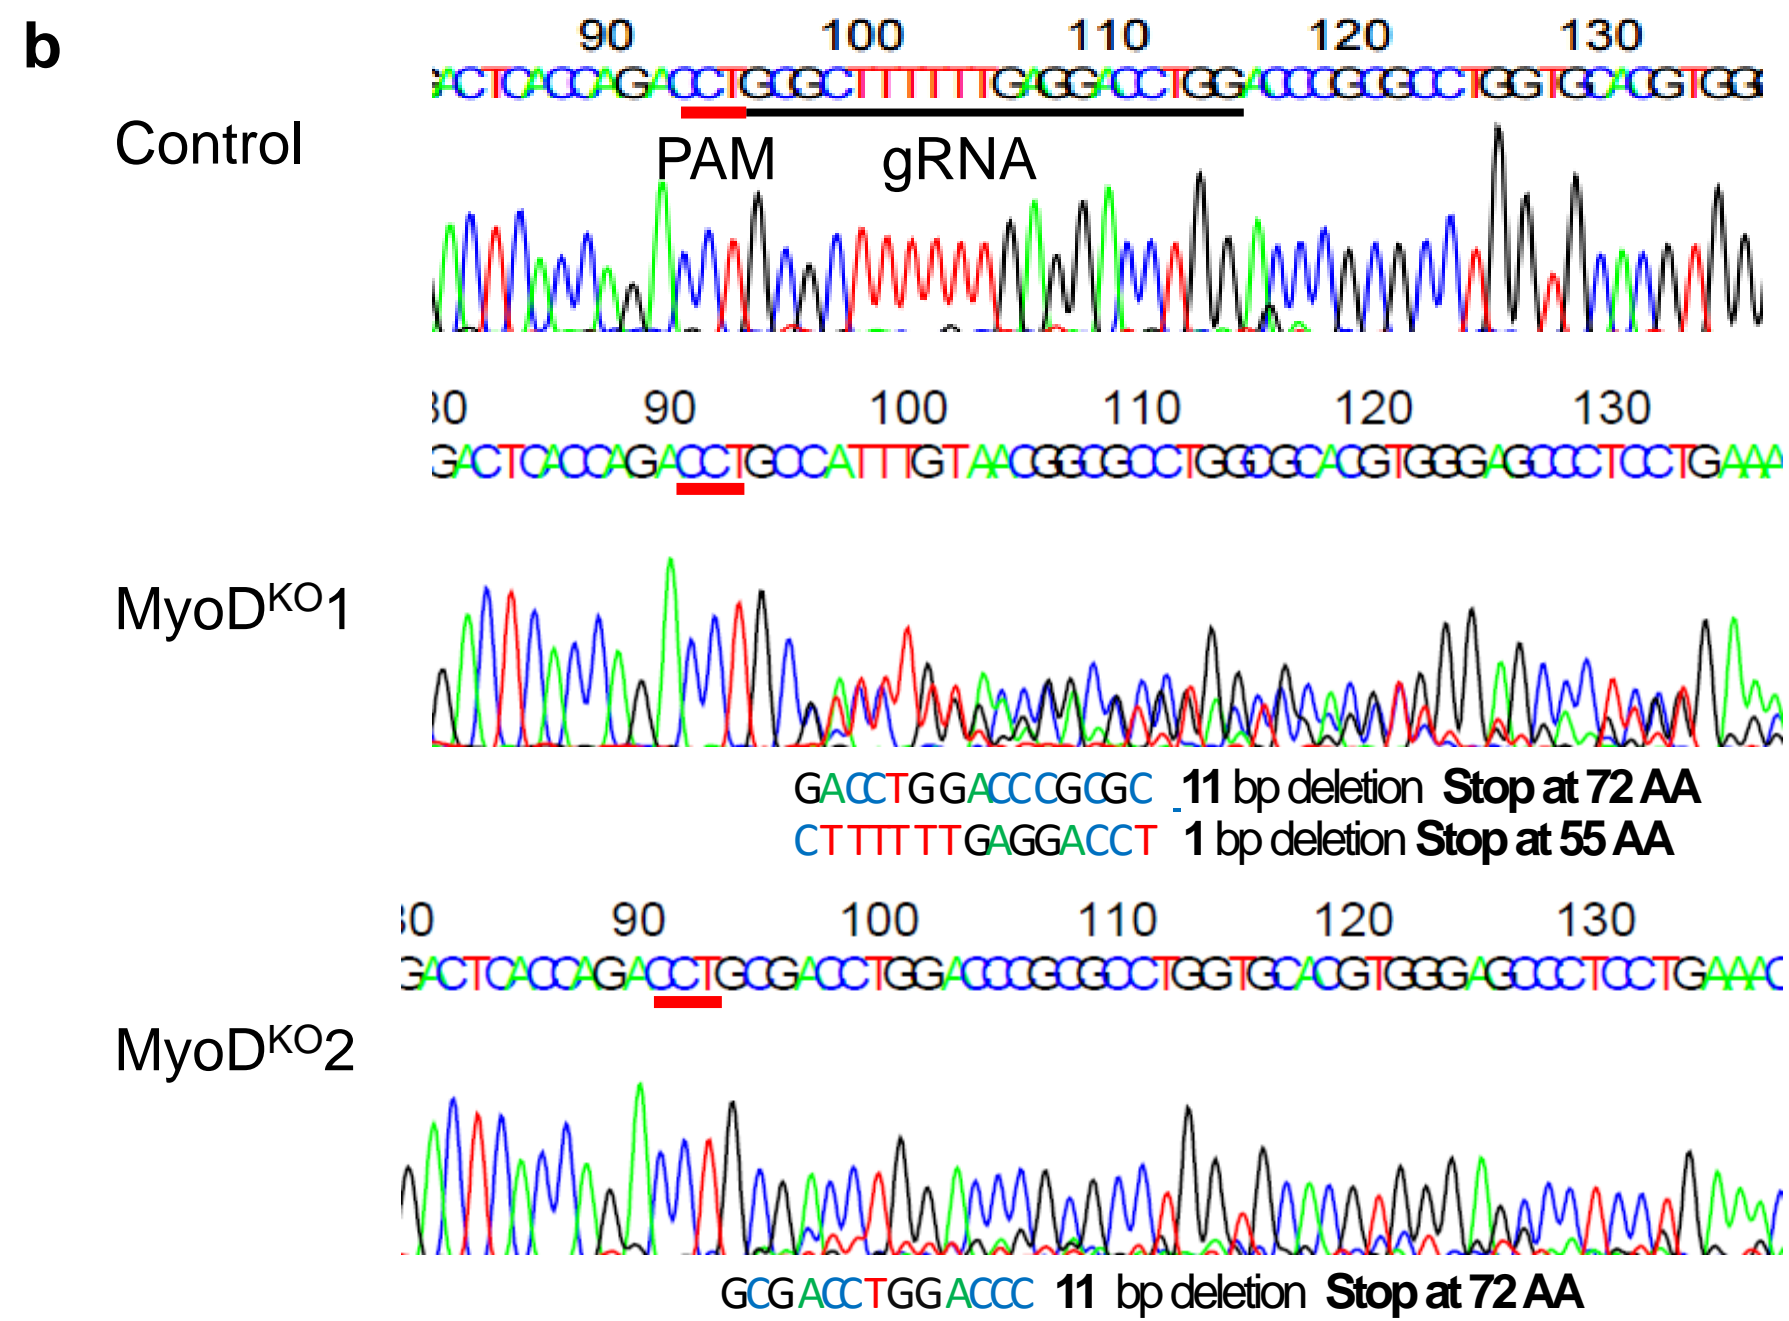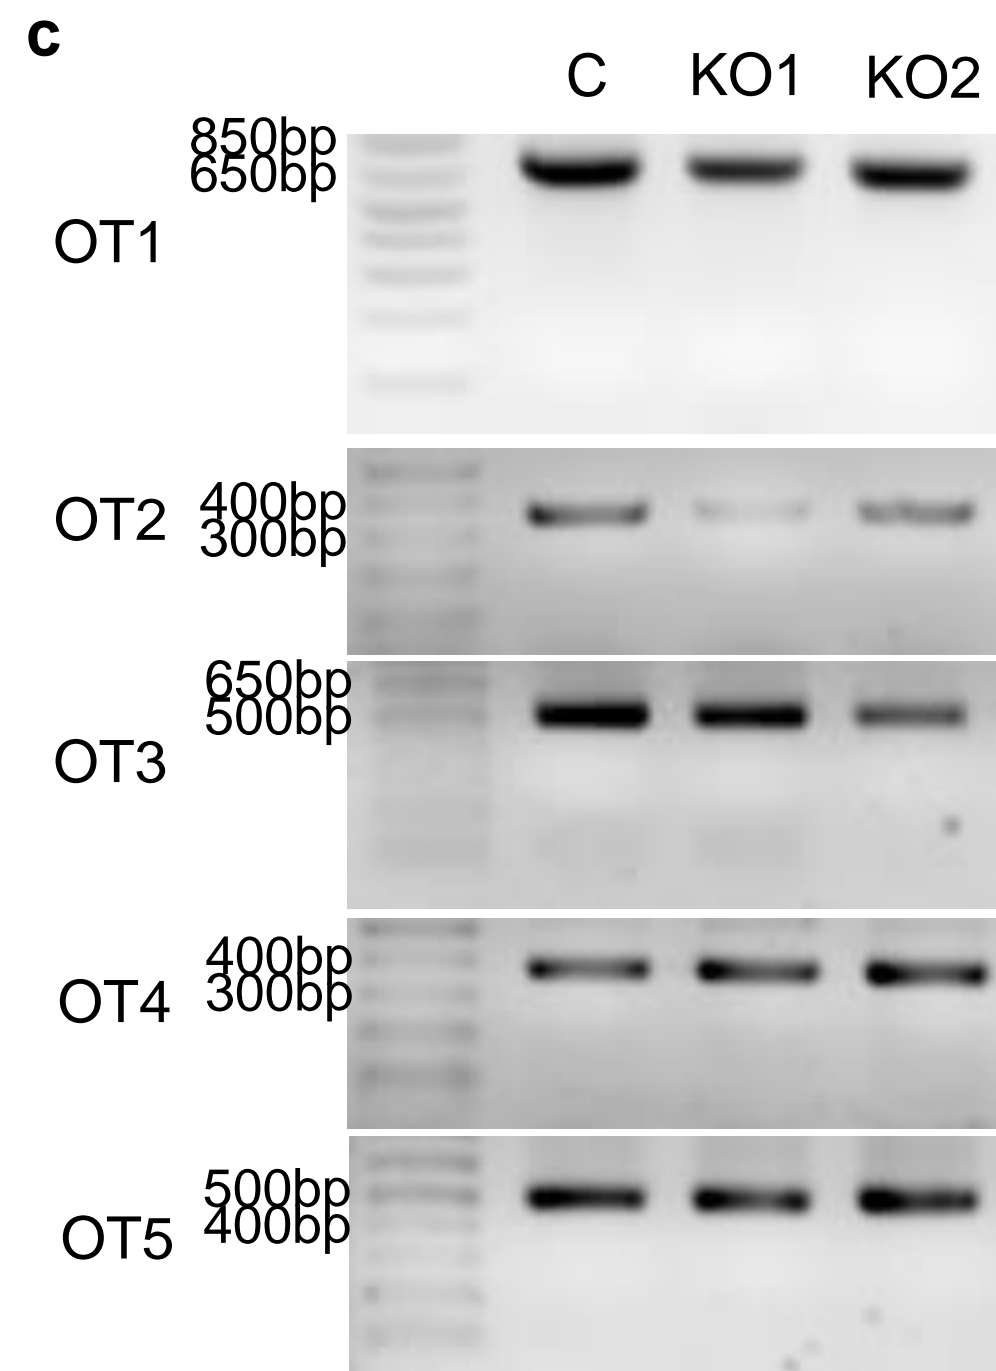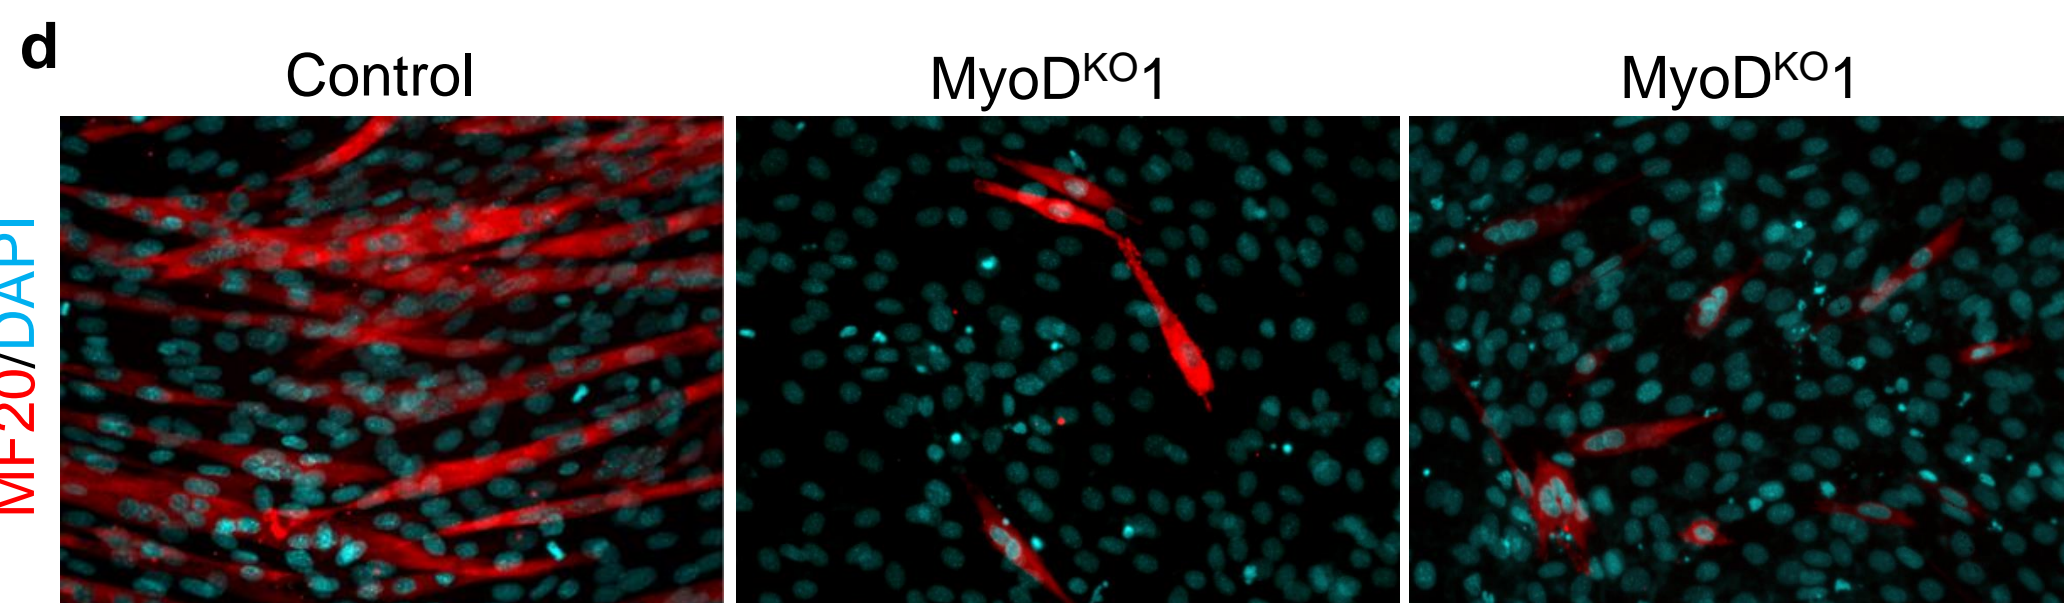

Supplementary Figure 2

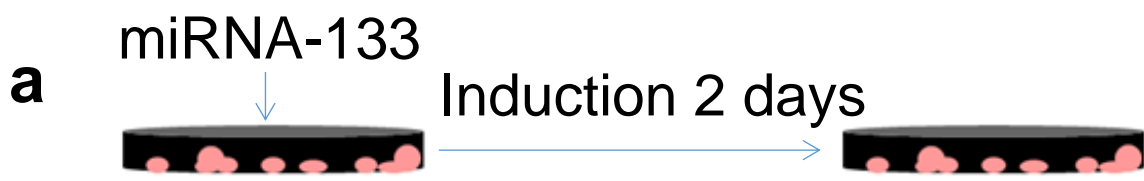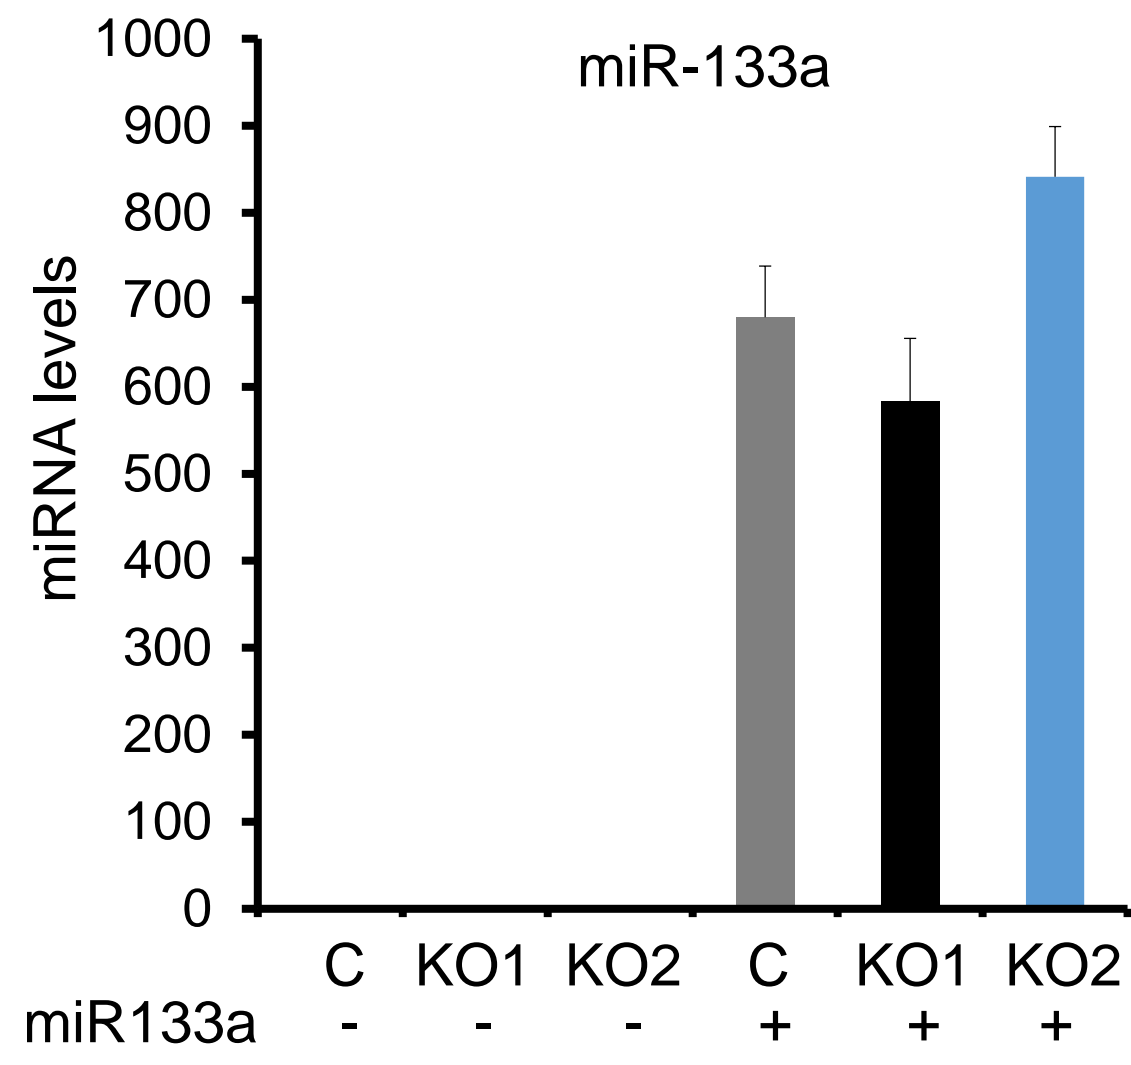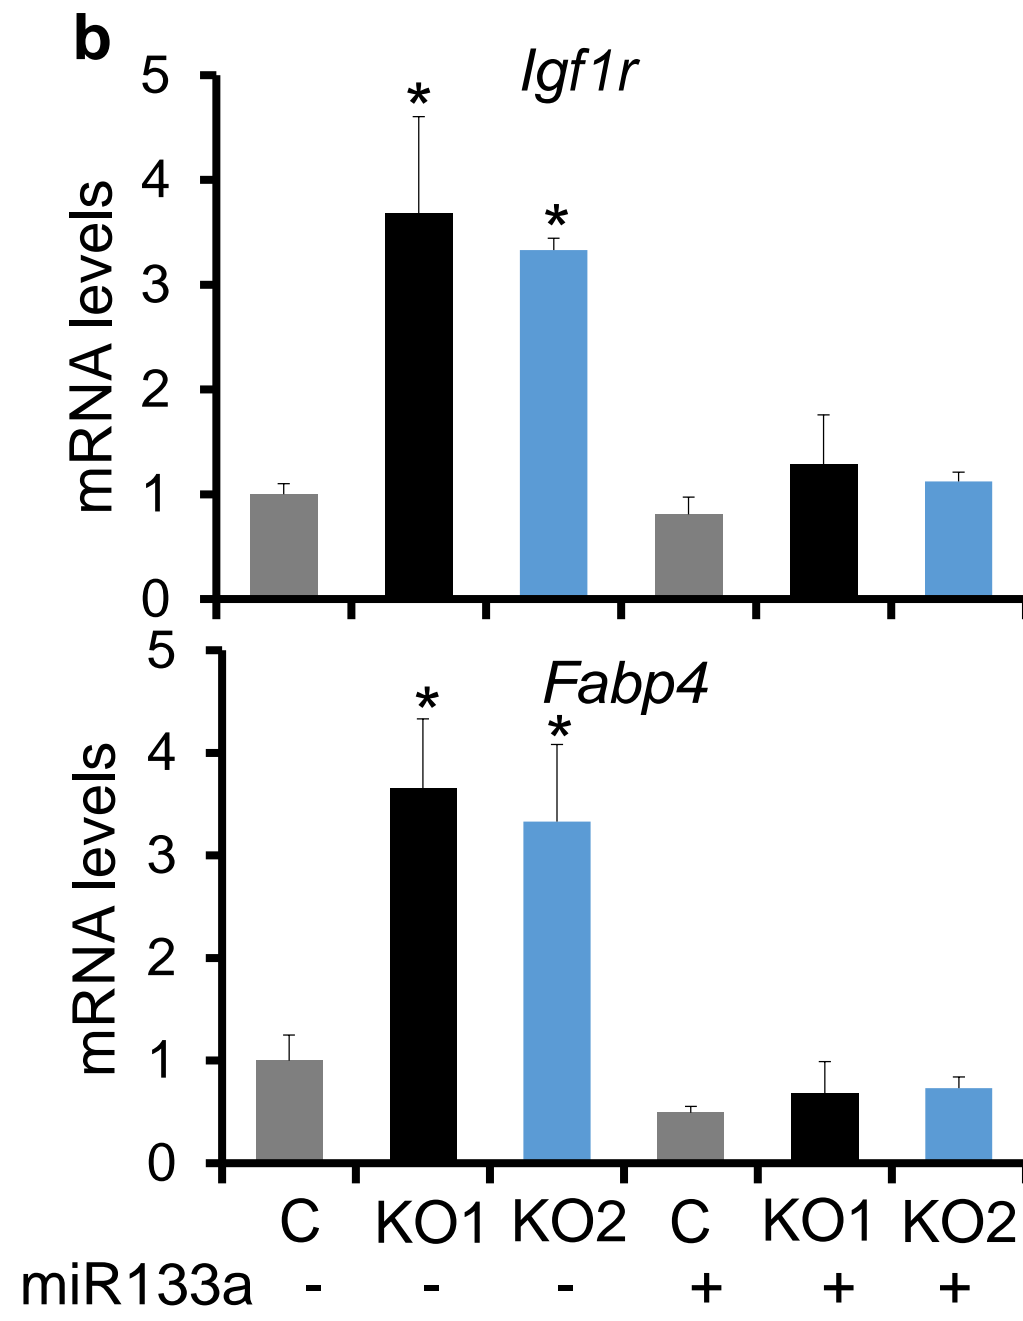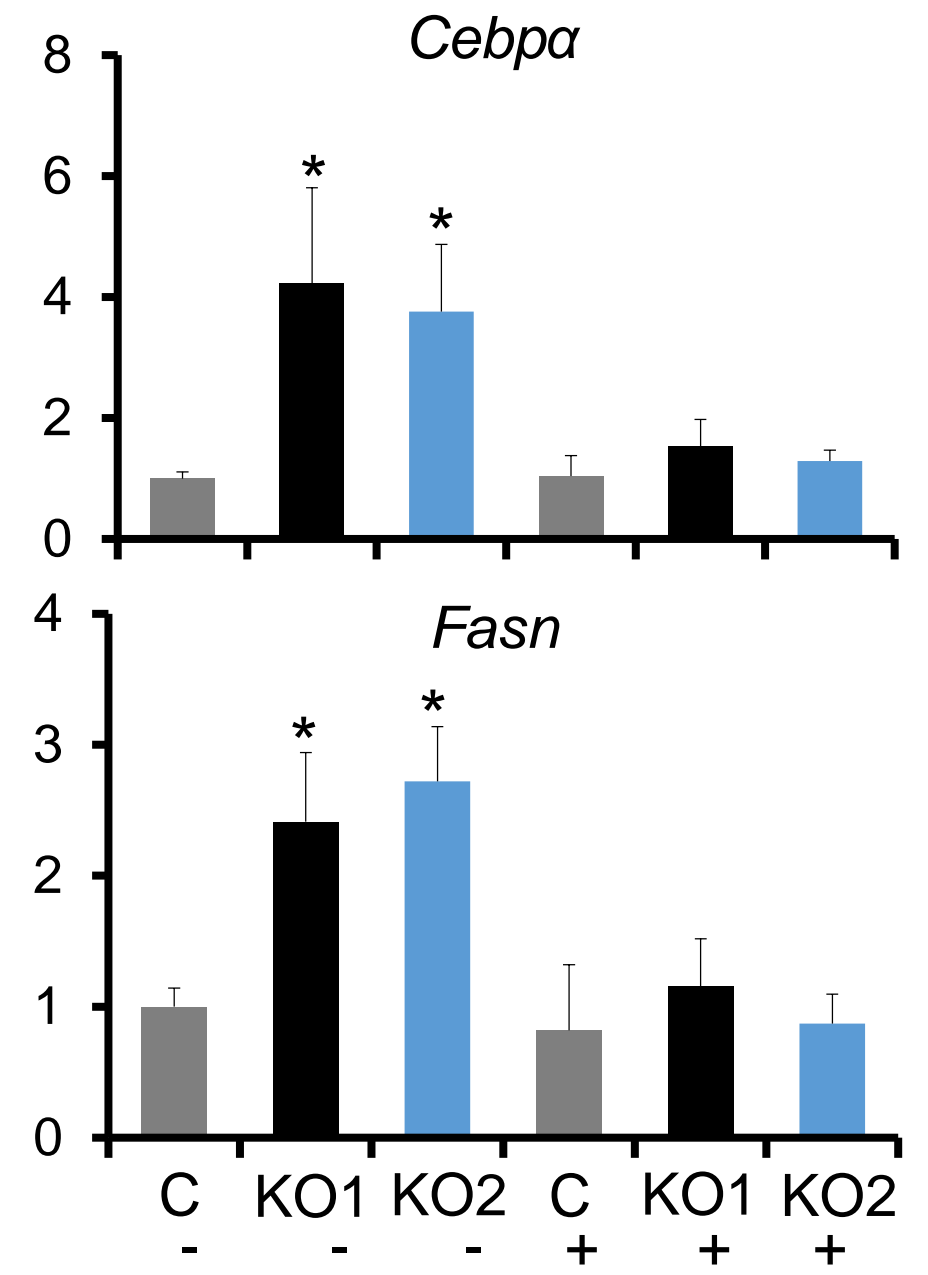

Supplementary Figure 3

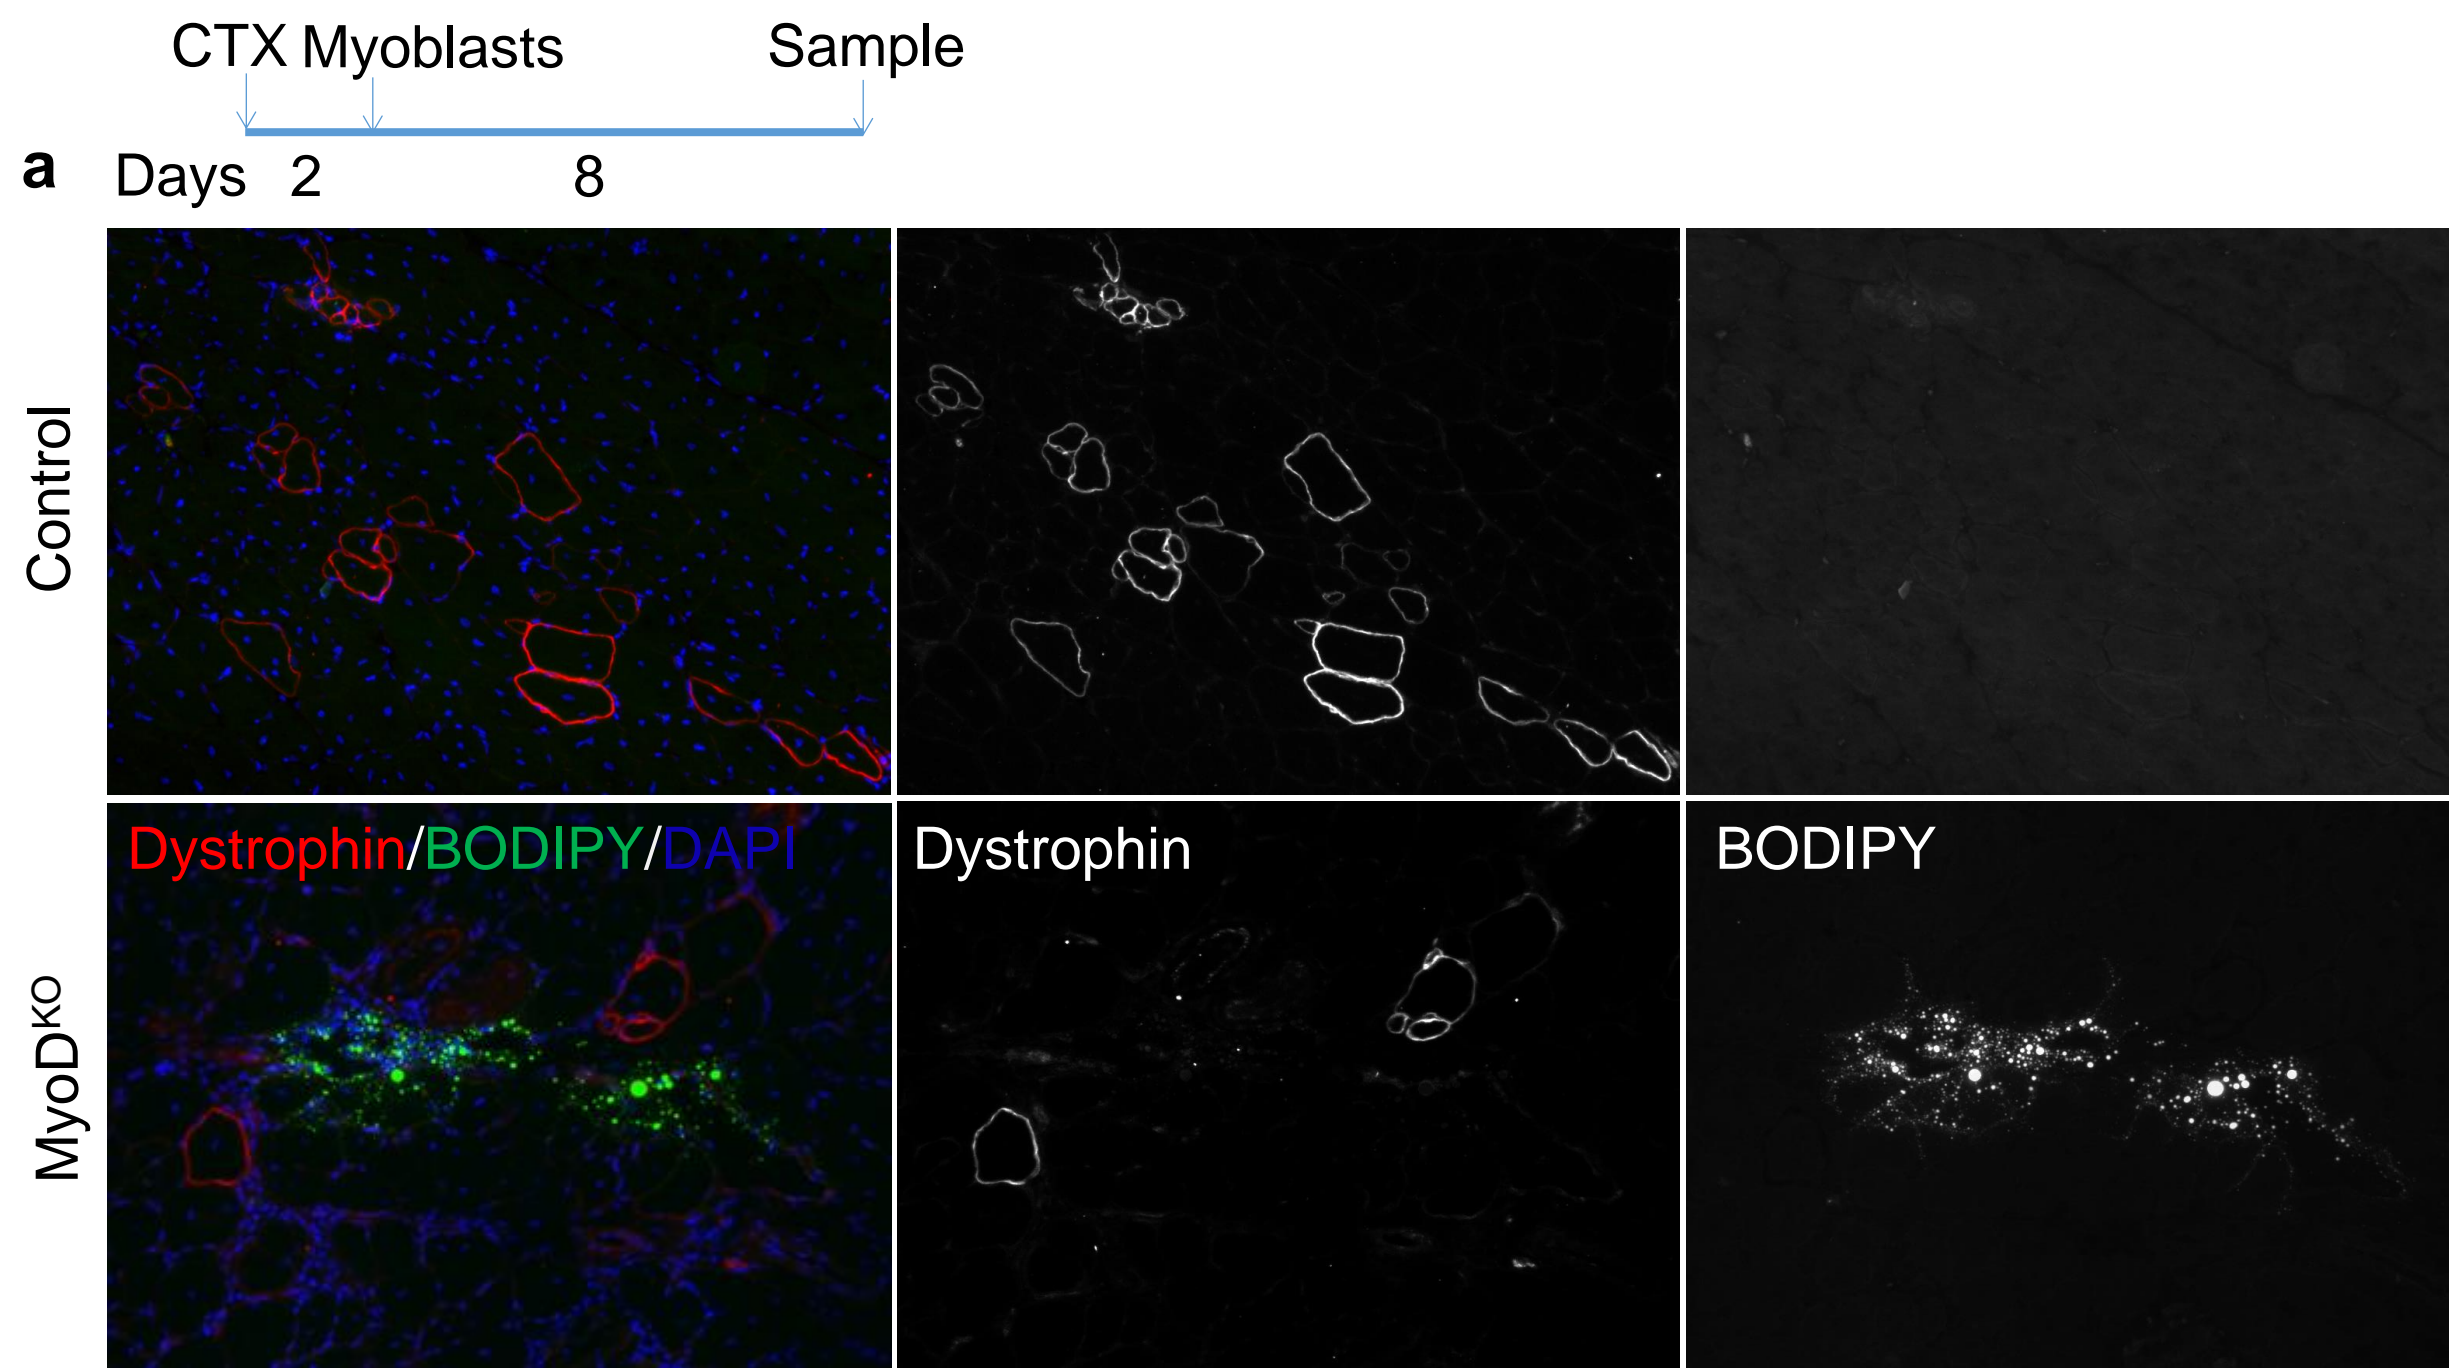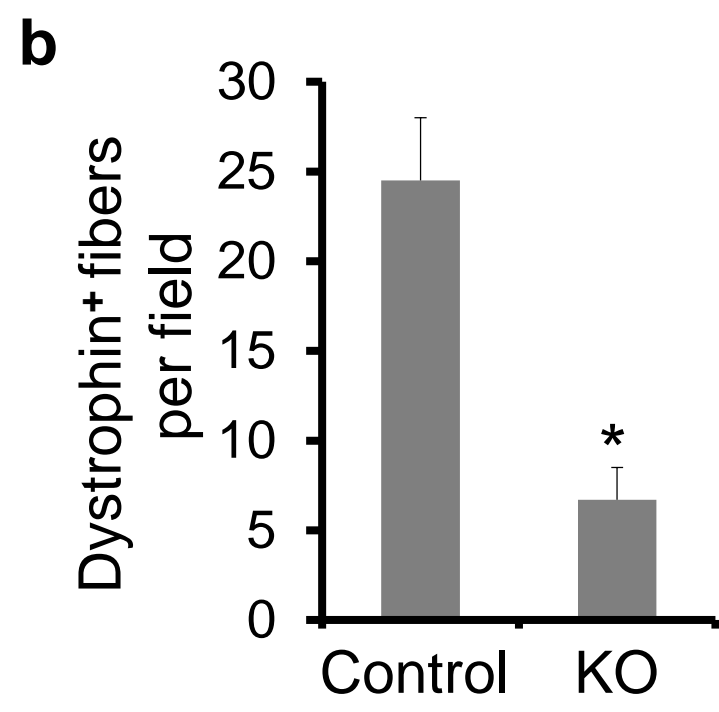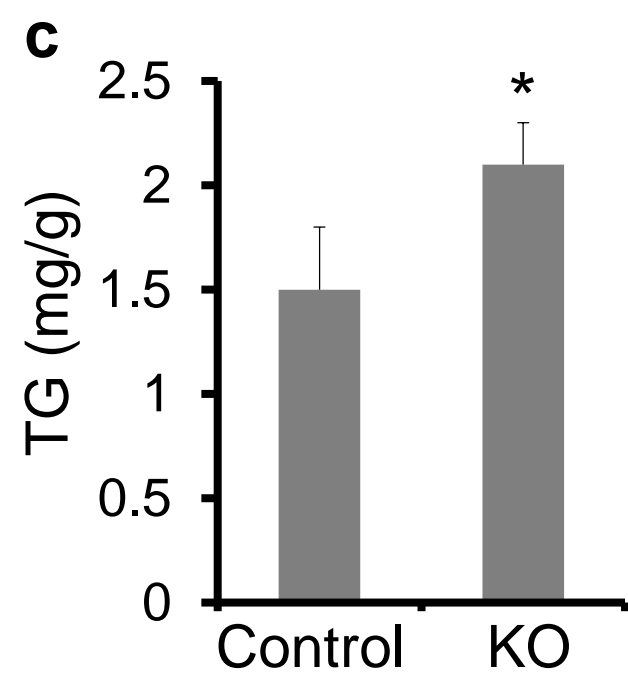

Supplementary Figure 4

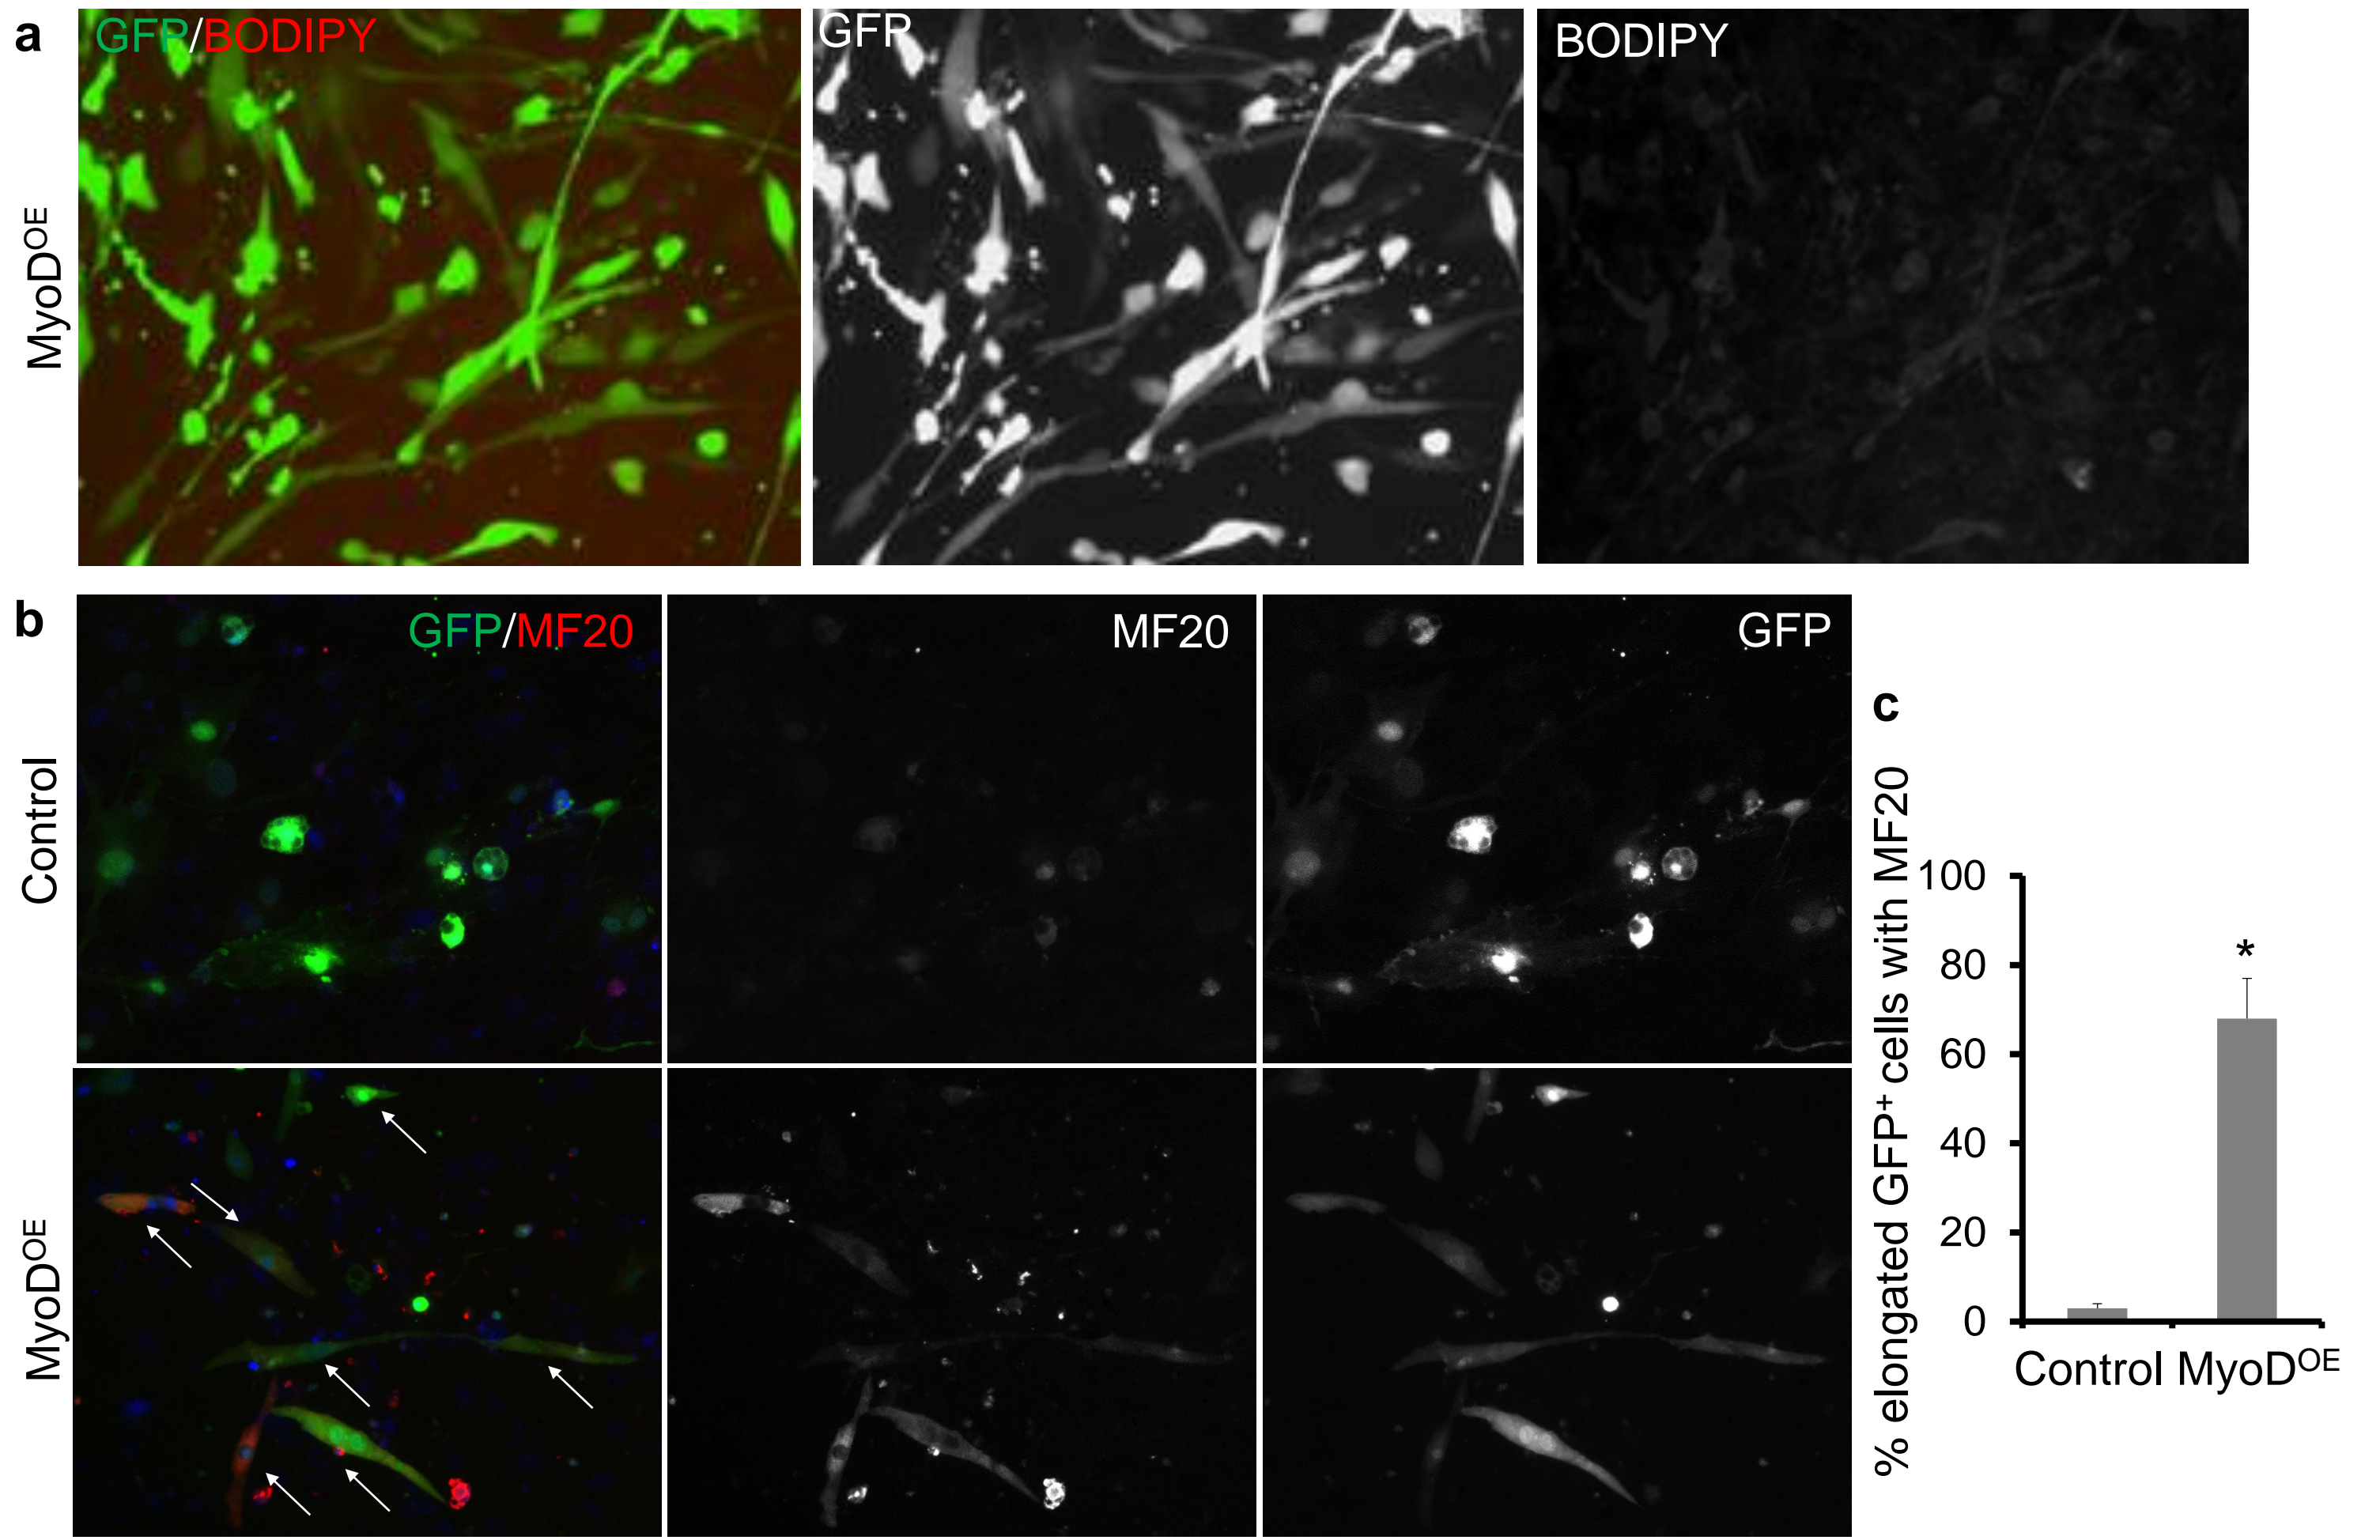

Supplement: mmc1.pdf [file mmc1.pdf]
